# Supplementary material for: Molecular Diversity and Network Complexity in Growing Protocells
Source: MDPI journal article supplement (doi:10.3390/life9020053), 2019-06-20
Supplement: s1 [file s1]

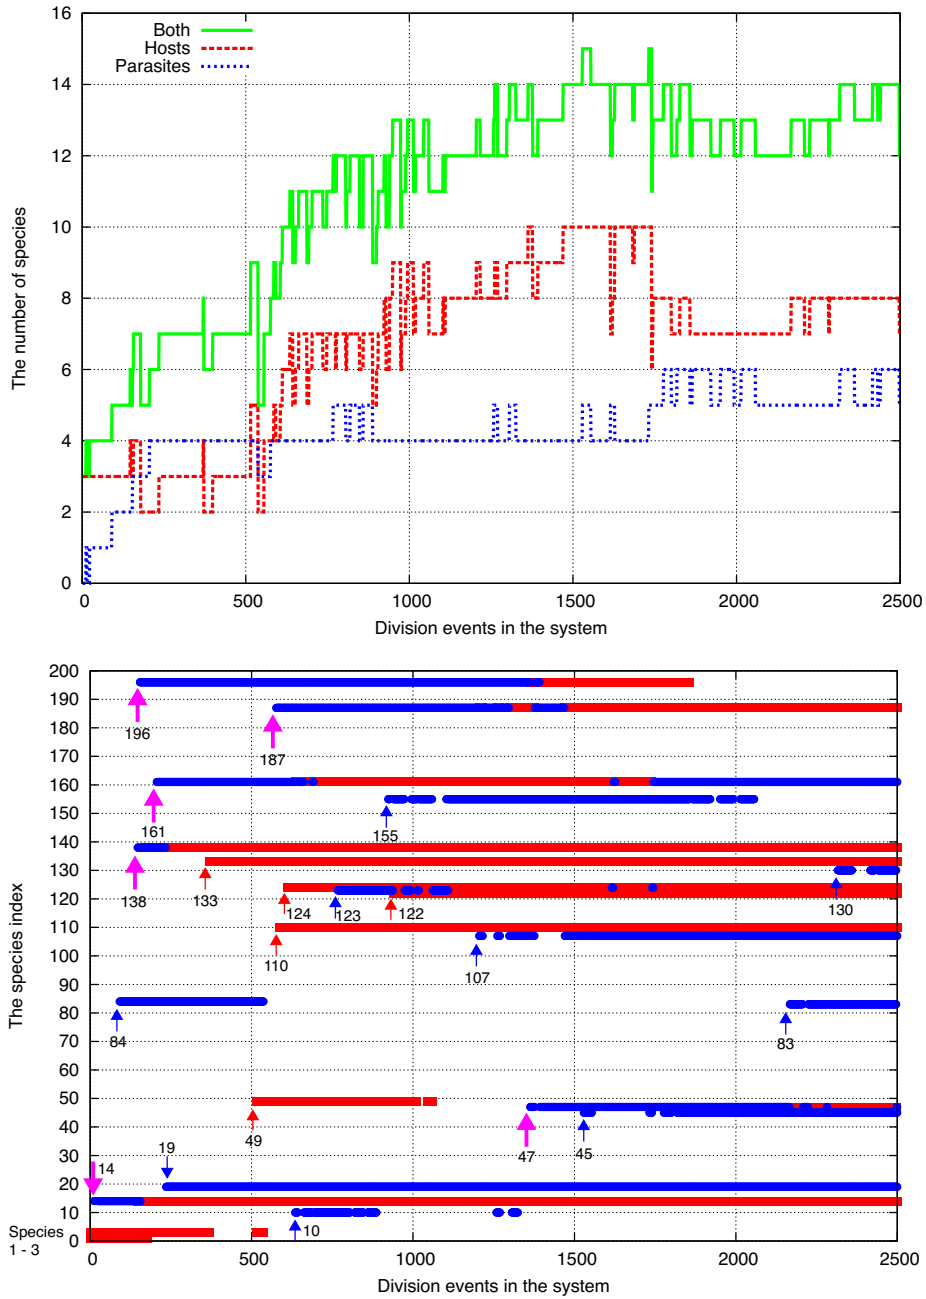

Figure S1: Another example of Figure 5 in the main text. Although we do not distinguish here hosts and sub-hosts, the result indicates that molecular species appear first as parasites, and later they turn to be host species with further diversification of molecular species.
